# Supplementary material for: Adsorption and sensing mechanisms of Ni-doped PtTe2 monolayer upon NO2 and O3 in air-insulated switchgears
Source: Royal Society of Chemistry journal article supplement (doi:10.1039/d3ra03030j), 2023-01-01
Supplement: d3ra03030j1.pdf [file d3ra03030j1.pdf]

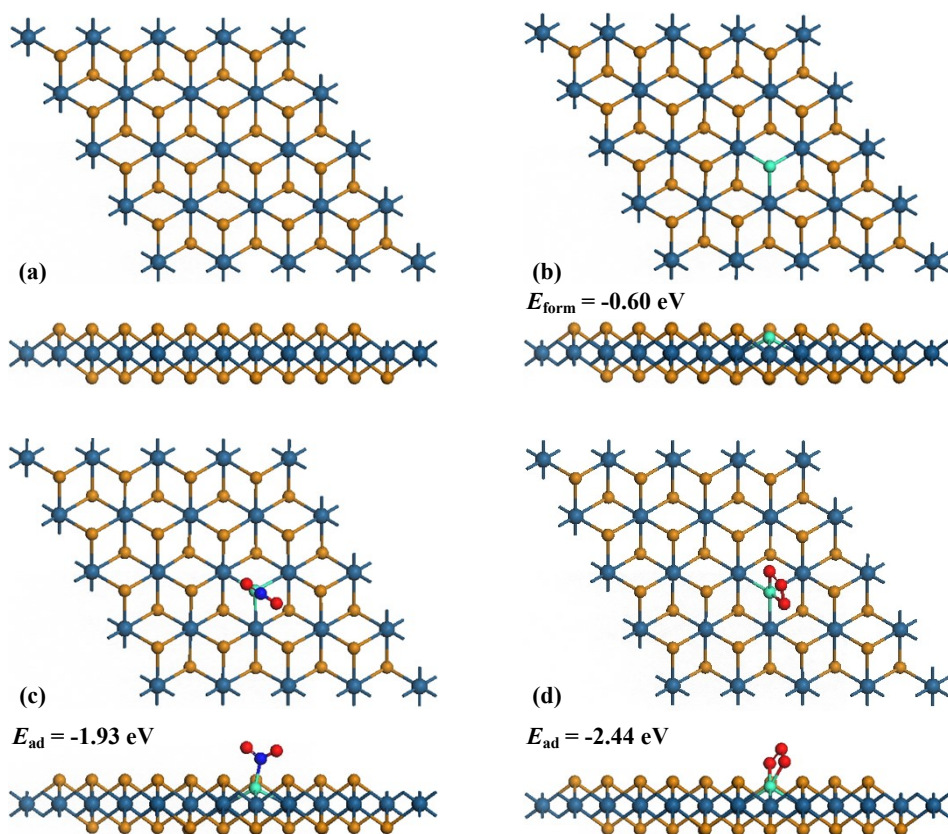

Figure S1 (a)-(b) pristine and Ni-doped  $4 \times 4 \times 1$  PtTe<sub>2</sub> monolayer, and (c)-(d) NO<sub>2</sub> and O<sub>3</sub> adsorption configurations
